# Supplementary material for: Differences in play can illuminate differences in affiliation: A comparative study on chimpanzees and gorillas
Source: PLoS One. 2018 Mar 7;13(3):e0193096. doi: 10.1371/journal.pone.0193096 (PMC5841745; doi:10.1371/journal.pone.0193096)
Supplement: S8 Table — (XLSX) [file pone.0193096.s008.xlsx]

## Sheet: table gorillas
IDplayers	PAI	duration	dia_poli	sex1	sex2	age1	age2	deltaNDS	bonding
sama	0.2	103	0	1	1	47	31	0.28	4.48
sama	0.25	15	0	1	1	47	31	0.28	4.48
samp	0.25	22	0	1	0	47	66	1.71	8.01
samp	0	29	0	1	0	47	66	1.71	8.01
samp	-1	13	0	1	0	47	66	1.71	8.01
samp	-1	16	0	1	0	47	66	1.71	8.01
sama	0.5	37	0	1	1	47	31	0.28	4.48
sama	0	11	0	1	1	47	31	0.28	4.48
sama	0.25	58	0	1	1	47	31	0.28	4.48
sama	0.11	35	0	1	1	47	31	0.28	4.48
sama	-0.4	21	0	1	1	47	31	0.28	4.48
samp	-0.17	117	0	1	0	47	66	1.71	8.01
samp	-0.04	138	0	1	0	47	66	1.71	8.01
kusa	-0.44	17	0	0	1	66	47	0.76	0
samp	0.01	322	0	1	0	47	66	1.71	8.01
asmp	0.25	62	1	0	0	288	66	2.7	11.31
samp	-0.1	80	1	1	0	47	66	1.71	8.01
assa	-0.33	79	1	0	1	288	47	4.41	43.96
samp	0.18	117	0	1	0	47	66	1.71	8.01
asmp	0.33	25	0	0	0	288	66	2.7	11.31
samp	0.06	151	0	1	0	47	66	1.71	8.01
samp	-0.38	28	0	1	0	47	66	1.71	8.01
kusa	0	11	0	1	1	62	47	0.76	0
asku	-0.6	10	0	0	1	288	62	3.65	0
mamy	0.67	10	0	1	1	31	96	2.84	21.93
kusa	-0.23	29	0	1	1	62	47	0.76	0
kusa	0	19	0	1	1	62	47	0.76	0
mpku	1	31	1	0	1	66	62	0.94	0
mpsa	1	31	1	0	1	66	47	1.71	8.01
mpku	0.36	19	0	0	1	66	62	0.94	0
maku	0.09	19	0	1	1	31	62	1.05	15.66
maku	0.23	65	0	1	1	31	62	1.05	15.66
mpma	-1	30	0	0	1	66	31	1.99	4.8
mpku	0.73	24	1	0	1	66	62	0.94	0
mysa	0.7	25	0	1	1	96	47	2.55	6.35
maku	-0.08	85	0	1	1	31	62	1.05	15.66
maku	0.12	87	0	1	1	31	62	1.05	15.66
maku	-0.25	29	0	1	1	31	62	1.05	15.66
mamp	-0.1	43	0	1	0	31	66	1.99	4.8
kuma	0.6	12	0	1	1	62	31	1.05	15.66
mpku	0.25	10	0	0	1	66	62	0.94	0
kuma	-0.2	13	0	1	1	62	31	1.05	15.66
kump	-0.5	28	0	1	0	62	66	0.94	0
saku	0.29	10	0	1	1	47	62	0.76	0
samp	-0.63	32	0	1	0	47	66	1.71	8.01
kump	-0.2	47	0	1	0	62	66	0.94	0
kump	-0.16	57	0	1	0	62	66	0.94	0
kusa	0.5	29	0	1	1	62	47	0.76	0
asmp	0.5	26	0	0	0	288	66	2.7	11.31
saku	-0.67	12	0	1	1	47	62	0.76	0
saku	0	10	0	1	1	47	62	0.76	0
samp	-0.14	15	0	1	0	47	66	1.71	8.01
samp	0.08	113	0	1	0	47	66	1.71	8.01
saku	-0.71	26	0	1	1	47	62	0.76	0
saku	-0.75	20	0	1	1	47	62	0.76	0
saku	-0.4	14	0	1	1	47	62	0.76	0
saku	-0.4	14	0	1	1	47	62	0.76	0
mpku	0.1	36	0	0	1	66	62	0.94	0
mpku	0.75	13	0	0	1	66	62	0.94	0
samp	0.38	32	0	1	0	47	66	1.71	8.01
saku	-0.43	17	0	1	1	47	62	0.76	0
mpku	0.03	89	0	0	1	66	62	0.94	0
mpku	0.29	41	0	0	1	66	62	0.94	0
saku	-0.4	48	0	1	1	47	62	0.76	0
saku	-0.33	18	0	1	1	47	62	0.76	0
saku	0.17	10	0	1	1	47	62	0.76	0
saku	-0.5	12	0	1	1	47	62	0.76	0
saku	-0.33	12	0	1	1	47	62	0.76	0
saku	-0.75	21	0	1	1	47	62	0.76	0
saku	-0.5	11	0	1	1	47	62	0.76	0
kumy	0.42	78	0	1	1	62	96	1.79	0
kumy	-0.22	59	0	1	1	62	96	1.79	0
kump	-0.33	14	0	1	0	62	66	0.94	0
samp	0.54	15	0	1	0	47	66	1.71	8.01
khku	0	127	0	1	1	100	62	0.7	0
mpmy	-0.25	30	0	0	1	66	96	0.85	6.67
sama	0.5	18	0	1	1	47	31	0.28	4.48
samp	-0.58	62	0	1	0	47	66	1.71	8.01
sama	0.5	21	0	1	1	47	31	0.28	4.48
sama	0	88	0	1	1	47	31	0.28	4.48
samp	-0.14	32	0	1	0	47	66	1.71	8.01
sama	0.25	15	0	1	1	47	31	0.28	4.48
kuma	0.25	55	0	1	1	62	31	1.05	15.66
saku	0	19	0	1	1	47	62	0.76	0
saku	-0.33	23	0	1	1	47	62	0.76	0
kump	0.25	38	0	1	0	62	66	0.94	0
kuma	0	15	0	1	1	62	31	1.05	15.66
sama	0.5	26	0	1	1	47	31	0.28	4.48
kump	0.2	32	0	1	0	62	66	0.94	0
kump	0.17	10	0	1	0	62	66	0.94	0
kuma	0.38	41	0	1	1	62	31	1.05	15.66
samy	-0.25	20	0	1	1	47	96	2.55	6.35
kusa	0.5	15	0	1	1	62	47	0.76	0
samp	-0.14	31	0	1	0	47	66	1.71	8.01
samp	0.67	10	0	1	0	47	66	1.71	8.01
samp	0	20	0	1	0	47	66	1.71	8.01
kusa	0.5	31	0	1	1	62	47	0.76	0
samp	0.5	13	0	1	0	47	66	1.71	8.01
kusa	-0.25	12	0	1	1	62	47	0.76	0
kuma	0.67	18	0	1	1	62	31	1.05	15.66
kusa	-0.2	17	0	1	1	62	47	0.76	0
kusa	-0.14	38	0	1	1	62	47	0.76	0
kusa	-0.29	12	0	1	1	62	47	0.76	0
kuma	0.75	20	0	1	1	62	31	1.05	15.66
saku	-0.64	79	0	1	1	47	62	0.76	0
saku	-0.57	92	0	1	1	47	62	0.76	0
kump	-0.4	17	0	1	0	62	66	0.94	0
kump	-0.33	10	0	1	0	62	66	0.94	0
samp	-0.25	12	0	1	0	47	66	1.71	8.01
kump	-0.33	70	0	1	0	62	66	0.94	0
kump	0.33	25	0	1	0	62	66	0.94	0
kump	-0.68	93	0	1	0	62	66	0.94	0
kumy	0.2	25	0	1	1	62	96	1.79	0
kumy	-0.33	31	0	1	1	62	96	1.79	0
kumy	0	23	0	1	1	62	96	1.79	0
kump	0.8	24	0	1	0	62	66	0.94	0
kuma	0	13	0	1	1	62	31	1.05	15.66
mpma	0.4	15	0	0	1	66	31	1.99	4.8
mpmy	-0.2	13	0	0	1	66	96	0.85	6.67
mpku	1	10	0	0	1	66	62	0.94	0
sama	0.11	15	0	1	1	47	31	0.28	4.48
kusa	-0.25	10	0	1	1	62	47	0.76	0
kump	1	11	1	1	0	62	66	0.94	0
myku	-1	11	1	1	1	96	62	1.79	0
mymp	0.5	28	1	1	0	96	66	0.85	6.67
mpmy	0.67	18	0	0	1	66	96	0.85	6.67
mpmy	0	33	0	0	1	66	96	0.85	6.67
myma	-1	39	0	1	1	96	31	2.84	21.93
kumy	-0.2	25	0	1	1	62	96	1.79	0
kumy	0.3	31	0	1	1	62	96	1.79	0
kumy	1	13	0	1	1	62	96	1.79	0
mpmy	0	12	0	0	1	66	96	0.85	6.67
mpku	0.5	12	0	0	1	66	62	0.94	0
mpku	0.14	25	0	0	1	66	62	0.94	0
mpku	0.11	52	0	0	1	66	62	0.94	0
mpku	-0.1	24	0	0	1	66	62	0.94	0
kuta	-0.5	14	0	1	1	62	351	1.96	87.5
kump	0.71	13	0	1	0	62	66	0.94	0
kusa	0	11	0	1	1	62	47	0.76	0
kusa	-0.33	15	0	1	1	62	47	0.76	0
samp	-0.4	12	1	1	0	47	66	1.71	8.01
mpsa	0.33	11	0	0	1	66	47	1.71	8.01
saku	0.5	23	0	1	1	47	62	0.76	0
khku	0	32	0	1	1	100	62	0.7	0
taku	0	20	0	1	1	351	62	1.96	87.5
samp	0.17	23	0	1	0	47	66	1.71	8.01
kusa	0.33	57	0	1	1	62	47	0.76	0
kuma	0	10	1	1	1	62	31	1.05	15.66
mpsa	0.88	10	0	0	1	66	47	1.71	8.01
mpsa	1	21	0	0	1	66	47	1.71	8.01
kuma	0.75	31	0	1	1	62	31	1.05	15.66
mpma	0.33	16	0	0	1	66	31	1.99	4.8
sama	0.33	16	0	1	1	47	31	0.28	4.48
saku	1	16	0	1	1	47	62	0.76	0
samp	0.33	10	1	1	0	47	66	1.71	8.01
mpsa	-0.4	15	0	0	1	66	47	1.71	8.01
mpsa	0.47	14	0	0	1	66	47	1.71	8.01
kusa	0.5	14	0	1	1	62	47	0.76	0
kusa	0.25	12	0	1	1	62	47	0.76	0
kump	1	11	0	1	0	62	66	0.94	0
mpsa	0.29	11	0	0	1	66	47	1.71	8.01
samp	0.1	10	0	1	0	47	66	1.71	8.01
myku	1	79	0	1	1	96	62	1.79	0
saku	1	79	0	1	1	47	62	0.76	0
mpsa	-0.09	79	0	0	1	66	47	1.71	8.01
mpsa	-0.57	10	0	0	1	66	47	1.71	8.01
kusa	-1	11	0	1	1	62	47	0.76	0
kuma	0.52	38	0	1	1	62	31	1.05	15.66
mpku	-1	21	1	0	1	66	62	0.94	0
kusa	1	31	1	1	1	62	47	0.76	0
samp	0.5	31	1	1	0	47	66	1.71	8.01
kump	0.5	52	0	1	0	62	66	0.94	0
kuma	0	14	0	1	1	62	31	1.05	15.66
kump	-0.71	10	0	1	0	62	66	0.94	0
mymp	1	16	1	1	0	96	66	0.85	6.67
kuma	-0.5	14	0	1	1	62	31	1.05	15.66
myma	0.25	34	0	1	1	96	31	2.84	21.93
samp	0.8	12	1	1	0	47	66	1.71	8.01
mysa	-0.33	16	0	1	1	96	47	2.55	6.35
mysa	0.25	50	0	1	1	96	47	2.55	6.35
kusa	0.5	42	0	1	1	62	47	0.76	0
myku	0.33	18	0	1	1	96	62	1.79	0
kuma	0.14	73	0	1	1	62	31	1.05	15.66
mamp	0	60	0	1	0	31	66	1.99	4.8
mamp	0.5	14	0	1	0	31	66	1.99	4.8
sama	0.2	37	0	1	1	47	31	0.28	4.48
mpas	-0.5	15	0	0	0	66	288	2.7	11.31
saas	-0.5	13	0	1	0	47	288	4.41	43.96
asmp	-1	16	1	0	0	288	66	2.7	11.31
assa	0	16	1	0	1	288	47	4.41	43.96
kump	-0.3	27	0	1	0	62	66	0.94	0
kump	-0.67	41	0	1	0	62	66	0.94	0
kump	-0.25	38	0	1	0	62	66	0.94	0
kusa	-0.27	54	0	1	1	62	47	0.76	0
kusa	-0.36	32	0	1	1	62	47	0.76	0
kumy	0.86	25	0	1	1	62	96	1.79	0
kusa	0	41	0	1	1	62	47	0.76	0
mpku	0.06	136	0	0	1	66	62	0.94	0
mpku	0.33	29	0	0	1	66	62	0.94	0
saku	-0.36	37	0	1	1	47	62	0.76	0
mpku	0	40	0	0	1	66	62	0.94	0
kusa	-0.1	108	0	1	1	62	47	0.76	0
kump	-0.26	138	0	1	0	62	66	0.94	0
mpku	-0.5	31	0	0	1	66	62	0.94	0
mymp	0.6	48	0	1	0	96	66	0.85	6.67
sama	0	12	0	1	1	47	31	0.28	4.48
kuma	0.25	28	0	1	1	62	31	1.05	15.66
kuma	0.71	15	0	1	1	62	31	1.05	15.66
saku	0	19	0	1	1	47	62	0.76	0
saku	-1	12	0	1	1	47	62	0.76	0
kuma	0.6	20	0	1	1	62	31	1.05	15.66
kuma	0.08	73	0	1	1	62	31	1.05	15.66
kuma	0.07	103	0	1	1	62	31	1.05	15.66
taku	0.67	25	0	1	1	351	62	1.96	87.5
taku	-0.32	169	0	1	1	351	62	1.96	87.5
kumy	-0.5	18	0	1	1	62	96	1.79	0
kuta	0.56	16	0	1	1	62	351	1.96	87.5
kump	-0.05	59	0	1	0	62	66	0.94	0
kump	-0.4	35	0	1	0	62	66	0.94	0
masa	-0.44	63	0	1	1	31	47	0.28	4.48
kump	0.07	64	0	1	0	62	66	0.94	0
mpsa	0.71	45	0	0	1	66	47	1.71	8.01
maku	0	11	0	1	1	31	62	1.05	15.66
mpku	0.17	14	0	0	1	66	62	0.94	0
mpsa	0.83	31	0	0	1	66	47	1.71	8.01
kuma	1	26	0	1	1	62	31	1.05	15.66
mpku	0.17	20	0	0	1	66	62	0.94	0
mpku	-0.29	30	0	0	1	66	62	0.94	0
kusa	0.1	33	0	1	1	62	47	0.76	0
kump	-0.2	19	0	1	0	62	66	0.94	0
kusa	0.4	18	0	1	1	62	47	0.76	0
mpsa	0	21	0	0	1	66	47	1.71	8.01
sama	0.35	97	0	1	1	47	31	0.28	4.48
sama	-0.25	141	0	1	1	47	31	0.28	4.48
mpku	0.67	13	0	0	1	66	62	0.94	0
sama	0.6	33	0	1	1	47	31	0.28	4.48
kuas	-0.5	16	0	1	0	62	288	3.65	0
kuma	-0.33	10	0	1	1	62	31	1.05	15.66
saku	0	17	0	1	1	47	62	0.76	0
kuma	0.5	16	0	1	1	62	31	1.05	15.66
kump	-0.36	101	0	1	0	62	66	0.94	0
kump	0.33	19	0	1	0	62	66	0.94	0
kump	0.5	37	0	1	0	62	66	0.94	0
kuma	0.5	34	0	1	1	62	31	1.05	15.66
kuma	0.29	64	0	1	1	62	31	1.05	15.66
kuma	-0.17	65	0	1	1	62	31	1.05	15.66
kuma	0.33	26	0	1	1	62	31	1.05	15.66
kuma	-0.31	34	0	1	1	62	31	1.05	15.66
kump	0	25	0	1	0	62	66	0.94	0
kuma	0.59	57	0	1	1	62	31	1.05	15.66
kuma	0.43	27	0	1	1	62	31	1.05	15.66
kuma	0.4	51	0	1	1	62	31	1.05	15.66
kuma	-0.33	34	0	1	1	62	31	1.05	15.66
kuma	0.11	14	0	1	1	62	31	1.05	15.66
kuma	1	19	0	1	1	62	31	1.05	15.66
mpku	0.33	11	0	0	1	66	62	0.94	0
taku	-0.14	27	0	1	1	351	62	1.96	87.5
samp	-0.2	12	0	1	0	47	66	1.71	8.01
sama	1	16	0	1	1	47	31	0.28	4.48
kuma	-1	12	0	1	1	62	31	1.05	15.66
saku	0	18	0	1	1	47	62	0.76	0
kump	-0.42	22	0	1	0	62	66	0.94	0
masa	-0.36	38	0	1	1	31	47	0.28	4.48
masa	0.3	53	0	1	1	31	47	0.28	4.48
masa	0.08	26	0	1	1	31	47	0.28	4.48
mpsa	0.5	12	0	0	1	66	47	1.71	8.01
mpsa	0.5	10	0	0	1	66	47	1.71	8.01
mpsa	0	12	0	0	1	66	47	1.71	8.01
kusa	-0.36	51	0	1	1	62	47	0.76	0
kuma	-0.67	10	0	1	1	62	31	1.05	15.66
kuma	0.13	13	0	1	1	62	31	1.05	15.66
kuma	0.3	133	0	1	1	62	31	1.05	15.66
mpku	0.29	10	0	0	1	66	62	0.94	0
mpku	-0.33	14	0	0	1	66	62	0.94	0
mpku	0.5	25	0	0	1	66	62	0.94	0
mpku	0	19	0	0	1	66	62	0.94	0
mpkh	0.17	26	0	0	1	66	100	0.24	17.42
mpkh	0	20	0	0	1	66	100	0.24	17.42
mpkh	0.17	59	0	0	1	66	100	0.24	17.42
mpkh	0	136	0	0	1	66	100	0.24	17.42
mamy	-1	15	1	1	1	31	96	2.84	21.93
mamy	1	12	1	1	1	31	96	2.84	21.93
mpmy	0	11	1	0	1	66	96	0.85	6.67
kump	0.8	23	0	1	0	62	66	0.94	0
kuma	0.8	12	0	1	1	62	31	1.05	15.66
mpas	1	11	1	0	0	66	288	2.7	11.31
samp	1	10	1	1	0	47	66	1.71	8.01
kump	0.1	53	0	1	0	62	66	0.94	0
kump	-0.3	22	0	1	0	62	66	0.94	0
maku	-0.44	55	0	1	1	31	62	1.05	15.66
myku	0.33	28	0	1	1	96	62	1.79	0
kuma	0.8	14	0	1	1	62	31	1.05	15.66
kuma	0.4	16	0	1	1	62	31	1.05	15.66
kump	-0.6	24	0	1	0	62	66	0.94	0
kumy	0.38	31	0	1	1	62	96	1.79	0
mpsa	0.47	45	0	0	1	66	47	1.71	8.01
mpsa	0.14	100	0	0	1	66	47	1.71	8.01
mpsa	-0.28	43	0	0	1	66	47	1.71	8.01
kuta	0.54	65	0	1	1	62	351	1.96	87.5
kuta	0	11	0	1	1	62	351	1.96	87.5
myku	0.25	43	0	1	1	96	62	1.79	0
mpku	0	11	0	0	1	66	62	0.94	0
mpku	0.63	38	0	0	1	66	62	0.94	0
samp	0.13	43	0	1	0	47	66	1.71	8.01
saku	0.33	16	0	1	1	47	62	0.76	0
mpkh	0.1	55	0	0	1	66	100	0.24	17.42
mpas	-0.17	47	0	0	0	66	288	2.7	11.31
mpsa	0.08	53	0	0	1	66	47	1.71	8.01
mpsa	-1	15	0	0	1	66	47	1.71	8.01
saku	0.33	49	0	1	1	47	62	0.76	0
sama	0.41	61	0	1	1	47	31	0.28	4.48
samp	-0.56	53	0	1	0	47	66	1.71	8.01
maku	1	14	0	1	1	31	62	1.05	15.66
maku	0.75	79	1	1	1	31	62	1.05	15.66
saku	1	79	1	1	1	47	62	0.76	0
sama	0.25	79	1	1	1	47	31	0.28	4.48
sama	-1	24	0	1	1	47	31	0.28	4.48
mpsa	0.75	64	0	0	1	66	47	1.71	8.01

## Sheet: table chimpanzees
IDplayers	PAI	duration	dia_poli	sex1	sex2	age1	age2	deltaNDS	bonding
yulb	0.33	11	0	0	0	20	16	0.82	1.18
yulb	0.24	66	0	0	0	20	16	0.82	1.18
yulb	0.39	58	0	0	0	20	16	0.82	1.18
yulo	0.25	19	0	0	0	20	50	0.73	3.01
lolb	-0.25	30	0	0	0	50	16	1.55	2.98
julb	0	22	0	1	0	396	16	0.53	1.47
yulb	-0.13	35	0	0	0	20	16	0.82	1.18
yulb	-0.19	116	0	0	0	20	16	0.82	1.18
yulb	0.58	120	0	0	0	20	16	0.82	1.18
yulb	-0.25	13	0	0	0	20	16	0.82	1.18
yulb	0.05	172	0	0	0	20	16	0.82	1.18
yulb	-0.1	58	0	0	0	20	16	0.82	1.18
yulb	0.17	14	0	0	0	20	16	0.82	1.18
yulb	0.25	25	0	0	0	20	16	0.82	1.18
walo	0	16	0	1	0	83	50	1	0.52
yulb	0.21	143	0	0	0	20	16	0.82	1.18
yulo	-0.2	11	1	0	0	20	50	0.73	3.01
tulb	0	54	0	0	0	81	16	1.03	12.11
salb	0	14	0	1	0	111	16	1.23	2.92
gyyu	0.2	32	0	1	0	344	20	0.72	23.69
gylb	0	15	0	1	0	344	16	0.1	6.82
lolb	0	24	0	0	0	50	16	1.55	2.98
tuyu	-0.5	19	0	0	0	81	20	0.22	4.02
tuyu	-0.33	20	0	0	0	81	20	0.22	4.02
tuyu	-1	21	0	0	0	81	20	0.22	4.02
walb	-0.5	17	0	1	0	83	16	0.55	6.52
logy	0	92	0	0	1	50	344	1.45	28.66
yulb	-0.5	13	0	0	0	20	16	0.82	1.18
yutu	0.29	107	0	0	0	20	81	0.22	4.02
yutu	1	12	0	0	0	20	81	0.22	4.02
yutu	-0.75	41	0	0	0	20	81	0.22	4.02
yutu	0.67	30	0	0	0	20	81	0.22	4.02
yutu	0.22	72	0	0	0	20	81	0.22	4.02
lolb	0.2	38	0	0	0	50	16	1.55	2.98
tulb	-0.33	17	0	0	0	81	16	1.03	12.11
lotu	-0.33	44	0	0	0	50	81	0.52	0
lotu	-0.25	12	0	0	0	50	81	0.52	0
tulb	-0.09	61	0	0	0	81	16	1.03	12.11
dolb	0	26	0	1	0	310	16	0.18	38.06
tulb	1	16	1	0	0	81	16	1.03	12.11
lotu	-0.83	15	1	0	0	50	81	0.52	0
lblo	1	23	1	0	0	16	50	1.55	2.98
lbtu	-0.4	40	1	0	0	16	81	1.03	12.11
lotu	-0.2	21	1	0	0	50	81	0.52	0
lblo	-0.44	30	0	0	0	16	50	1.55	2.98
lblo	1	37	1	0	0	16	50	1.55	2.98
tulb	0.6	19	0	0	0	81	16	1.03	12.11
salo	0.33	21	1	1	0	111	50	2.78	3.12
satu	0	23	1	1	0	111	81	2.27	1.14
tulb	0.64	40	0	0	0	81	16	1.03	12.11
lolb	0.19	165	0	0	0	50	16	1.55	2.98
lolb	-0.48	79	1	0	0	50	16	1.55	2.98
tulb	0.25	32	1	0	0	81	16	1.03	12.11
tulo	0.67	78	1	0	0	81	50	0.52	0
tulo	0.67	18	0	0	0	81	50	0.52	0
tulo	-0.5	13	0	0	0	81	50	0.52	0
tulo	-0.63	10	0	0	0	81	50	0.52	0
tulo	0	11	0	0	0	81	50	0.52	0
tulo	0.2	13	0	0	0	81	50	0.52	0
tulo	0.67	22	0	0	0	81	50	0.52	0
lolb	0.46	72	0	0	0	50	16	1.55	2.98
salb	-0.67	23	0	1	0	111	16	1.23	2.92
salo	0.2	22	0	1	0	111	50	2.78	3.12
salb	-0.4	17	0	1	0	111	16	1.23	2.92
salb	-0.5	25	0	1	0	111	16	1.23	2.92
tulb	0	23	0	0	0	81	16	1.03	12.11
tulb	-0.4	22	0	0	0	81	16	1.03	12.11
tulb	0.25	51	0	0	0	81	16	1.03	12.11
tulb	0	46	0	0	0	81	16	1.03	12.11
joyu	0	27	1	0	0	480	20	2.98	8.6
joyu	1	16	0	0	0	480	20	2.98	8.6
loyu	0.4	30	0	0	0	50	20	0.73	3.01
yulb	0	32	0	0	0	20	16	0.82	1.18
yulb	-0.22	36	0	0	0	20	16	0.82	1.18
yulb	0.17	28	0	0	0	20	16	0.82	1.18
jolo	0.05	134	0	0	0	480	50	3.72	3.18
jolb	0	22	0	0	0	480	16	2.17	7.4
jolo	0.33	32	0	0	0	480	50	3.72	3.18
tulb	0	24	0	0	0	81	16	1.03	12.11
jolb	0.33	31	0	0	0	480	16	2.17	7.4
jolb	0.33	91	0	0	0	480	16	2.17	7.4
walb	0	17	0	1	0	83	16	0.55	6.52
salb	1	23	0	1	0	111	16	1.23	2.92
sami	0	14	1	1	1	111	444	1.78	3.35
yusa	0.5	20	1	0	1	20	111	2.05	5.32
sayu	0.5	33	0	1	0	111	20	2.05	5.32
loyu	-0.67	12	0	0	0	50	20	0.73	3.01
salb	0	41	0	1	0	111	16	1.23	2.92
salb	-0.22	38	0	1	0	111	16	1.23	2.92
joyu	0	24	0	0	0	480	20	2.98	8.6
joyu	0.14	67	0	0	0	480	20	2.98	8.6
joyu	-0.3	199	0	0	0	480	20	2.98	8.6
joyu	0.1	73	0	0	0	480	20	2.98	8.6
tujo	0.67	29	0	0	0	81	480	3.2	4.51
tujo	0	36	0	0	0	81	480	3.2	4.51
yulb	-0.15	83	0	0	0	20	16	0.82	1.18
lblo	-0.38	20	1	0	0	16	50	1.55	2.98
tulb	0	16	1	0	0	81	16	1.03	12.11
tulb	-0.29	19	0	0	0	81	16	1.03	12.11
lolb	0.14	25	0	0	0	50	16	1.55	2.98
lbtu	0.67	23	1	0	0	16	81	1.03	12.11
lolb	0.75	22	1	0	0	50	16	1.55	2.98
tulb	-1	22	1	0	0	81	16	1.03	12.11
lolb	-0.2	17	1	0	0	50	16	1.55	2.98
lotu	-0.5	17	1	0	0	50	81	0.52	0
tulb	0.5	15	1	0	0	81	16	1.03	12.11
salb	-0.5	13	0	1	0	111	16	1.23	2.92
lbjo	0	36	0	0	0	16	480	2.17	7.4
lbjo	-0.08	134	0	0	0	16	480	2.17	7.4
yulb	0.38	43	0	0	0	20	16	0.82	1.18
salb	0	18	0	1	0	111	16	1.23	2.92
yulb	0	20	0	0	0	20	16	0.82	1.18
tulb	-0.5	19	0	0	0	81	16	1.03	12.11
tulb	-0.38	53	0	0	0	81	16	1.03	12.11
tulb	-0.67	13	0	0	0	81	16	1.03	12.11
tulb	-0.33	26	0	0	0	81	16	1.03	12.11
gylo	0	16	0	1	0	344	50	1.45	28.66
miyu	0.13	80	0	1	0	444	20	0.27	7.82
lotu	-0.67	12	0	0	0	50	81	0.52	0
sayu	-0.43	17	0	1	0	111	20	2.05	5.32
miyu	0	179	0	1	0	444	20	0.27	7.82
miyu	0.25	43	0	1	0	444	20	0.27	7.82
lbyu	-0.3	19	0	0	0	16	20	0.82	1.18
wayu	0.8	21	0	1	0	83	20	0.27	5.99
yuwa	-0.22	36	0	0	1	20	83	0.27	5.99
lbyu	1	10	1	0	0	16	20	0.82	1.18
satu	-0.25	14	0	1	0	111	81	2.27	1.14
joyu	-0.51	293	0	0	0	480	20	2.98	8.6
yuga	-0.17	42	0	0	0	20	312	0.07	3.97
tuwa	0.67	50	0	0	1	81	83	0.48	0
tulo	0.09	57	0	0	0	81	50	0.52	0
tulo	0.67	11	0	0	0	81	50	0.52	0
tulb	0.5	16	0	0	0	81	16	1.03	12.11
milb	-0.25	13	0	1	0	444	16	0.55	1.67
salb	-1	66	0	1	0	111	16	1.23	2.92
tulo	0.5	39	0	0	0	81	50	0.52	0
tulb	0	12	0	0	0	81	16	1.03	12.11
tulo	0	15	0	0	0	81	50	0.52	0
tulb	-0.3	20	0	0	0	81	16	1.03	12.11
dotu	0.14	25	0	1	0	310	81	0.85	22.39
bolo	0.17	24	0	1	0	396	50	1.55	23.52
bolo	0.75	20	0	1	0	396	50	1.55	23.52
lolb	0.67	11	0	0	0	50	16	1.55	2.98
gysa	0	11	1	1	1	344	111	1.33	11.49
salo	0	11	1	1	0	111	50	2.78	3.12
gysa	0	48	1	1	1	344	111	1.33	11.49
salo	0	48	1	1	0	111	50	2.78	3.12
wagy	-0.4	33	1	1	1	83	344	0.45	3.05
walo	-0.44	33	1	1	0	83	50	1	0.52
wagy	0	23	1	1	1	83	344	0.45	3.05
wagy	0	18	1	1	1	83	344	0.45	3.05
walo	0	21	1	1	0	83	50	1	0.52
walo	-0.33	20	0	1	0	83	50	1	0.52
walo	0	12	0	1	0	83	50	1	0.52
lolb	0.18	45	0	0	0	50	16	1.55	2.98
lbjo	0.25	37	0	0	0	16	480	2.17	7.4
lbwa	-0.47	109	0	0	1	16	83	0.55	6.52
lbwa	-0.46	252	0	0	1	16	83	0.55	6.52
tulb	0.33	18	0	0	0	81	16	1.03	12.11
walb	0.5	47	0	1	0	83	16	0.55	6.52
salb	0.33	16	0	1	0	111	16	1.23	2.92
tuyu	0.5	23	0	0	0	81	20	0.22	4.02
tulb	-0.33	20	0	0	0	81	16	1.03	12.11
tulb	0.25	23	0	0	0	81	16	1.03	12.11
gywa	0	60	1	1	1	344	83	0.45	3.05
gyyu	-1	64	1	1	0	344	20	0.72	23.69
wayu	-0.5	66	1	1	0	83	20	0.27	5.99
wayu	0	72	0	1	0	83	20	0.27	5.99
walo	0.4	29	0	1	0	83	50	1	0.52
jolo	-0.13	90	0	0	0	480	50	3.72	3.18
tujo	0.25	53	0	0	0	81	480	3.2	4.51
tujo	0	13	0	0	0	81	480	3.2	4.51
wayu	0.14	59	0	1	0	83	20	0.27	5.99
sayu	-0.5	24	0	1	0	111	20	2.05	5.32
wayu	0.67	20	0	1	0	83	20	0.27	5.99
sayu	0	17	0	1	0	111	20	2.05	5.32
losa	0.67	12	1	0	1	50	111	2.78	3.12
sayu	-0.75	82	0	1	0	111	20	2.05	5.32
gylo	-0.55	63	0	1	0	344	50	1.45	28.66
tulo	0.33	19	0	0	0	81	50	0.52	0
yulo	0	20	0	0	0	20	50	0.73	3.01
jotu	0.14	209	0	0	0	480	81	3.2	4.51
lbwa	0	16	0	0	1	16	83	0.55	6.52
logy	-0.36	33	0	0	1	50	344	1.45	28.66
logy	0.1	122	0	0	1	50	344	1.45	28.66
jolo	0.67	33	0	0	0	480	50	3.72	3.18
loyu	1	15	0	0	0	50	20	0.73	3.01
lotu	-0.33	22	0	0	0	50	81	0.52	0
lotu	0.06	85	0	0	0	50	81	0.52	0
sayu	-1	15	1	1	0	111	20	2.05	5.32
wayu	0.8	10	0	1	0	83	20	0.27	5.99
yulb	0	11	0	0	0	20	16	0.82	1.18
salb	-0.67	12	0	1	0	111	16	1.23	2.92
lbgy	0.5	33	0	0	1	16	344	0.1	6.82
yutu	-0.25	11	0	0	0	20	81	0.22	4.02
yusa	-0.33	42	0	0	1	20	111	2.05	5.32
boyu	0.5	16	1	1	0	396	20	0.82	47.62
chlb	0.18	86	0	1	0	469	16	0.75	4.73
lblo	0	12	0	0	0	16	50	1.55	2.98
tulo	0.44	20	0	0	0	81	50	0.52	0
yulb	0	12	0	0	0	20	16	0.82	1.18
lolb	0.31	59	0	0	0	50	16	1.55	2.98
loyu	0	65	0	0	0	50	20	0.73	3.01
loyu	0.83	90	0	0	0	50	20	0.73	3.01
yujo	-0.25	71	0	0	0	20	480	2.98	8.6
losa	0	56	0	0	1	50	111	2.78	3.12
lbyu	1	18	0	0	0	16	20	0.82	1.18
loyu	0.82	22	0	0	0	50	20	0.73	3.01
yulb	0.57	22	0	0	0	20	16	0.82	1.18
yulb	0.73	69	0	0	0	20	16	0.82	1.18
yulb	-0.22	68	0	0	0	20	16	0.82	1.18
yulb	0.4	30	0	0	0	20	16	0.82	1.18
yulb	0.33	58	0	0	0	20	16	0.82	1.18
yulb	0	38	0	0	0	20	16	0.82	1.18
yulb	-0.05	41	0	0	0	20	16	0.82	1.18
yulb	-0.37	83	1	0	0	20	16	0.82	1.18
yulb	-0.24	48	0	0	0	20	16	0.82	1.18
yulb	0.1	51	0	0	0	20	16	0.82	1.18
yulb	0.26	114	0	0	0	20	16	0.82	1.18
walb	1	16	1	1	0	83	16	0.55	6.52
yuwa	-0.8	16	1	0	1	20	83	0.27	5.99
yuwa	-0.2	21	0	0	1	20	83	0.27	5.99
yulb	0.56	107	0	0	0	20	16	0.82	1.18
lolb	0.35	70	0	0	0	50	16	1.55	2.98
gylb	1	16	0	1	0	344	16	0.1	6.82
gywa	0.56	23	0	1	1	344	83	0.45	3.05
walb	0.6	10	0	1	0	83	16	0.55	6.52
salo	0	14	0	1	0	111	50	2.78	3.12
tuwa	0.09	53	0	0	1	81	83	0.48	0
lotu	0	38	1	0	0	50	81	0.52	0
lowa	1	38	1	0	1	50	83	1	0.52
tuwa	0	38	1	0	1	81	83	0.48	0
jolb	0	13	0	0	0	480	16	2.17	7.4
jolb	0.67	68	0	0	0	480	16	2.17	7.4
joyu	0.2	56	0	0	0	480	20	2.98	8.6
joyu	0.33	13	0	0	0	480	20	2.98	8.6
joyu	0.63	48	0	0	0	480	20	2.98	8.6
logy	-0.14	111	0	0	1	50	344	1.45	28.66
logy	0	15	0	0	1	50	344	1.45	28.66
losa	0.55	85	0	0	1	50	111	2.78	3.12
loyu	0	23	1	0	0	50	20	0.73	3.01
yusa	0.45	23	1	0	1	20	111	2.05	5.32
losa	1	11	0	0	1	50	111	2.78	3.12
losa	0.75	12	1	0	1	50	111	2.78	3.12
wasa	0.33	12	1	1	1	83	111	1.78	54.37
yusa	0.52	44	0	0	1	20	111	2.05	5.32
lolb	-0.3	31	0	0	0	50	16	1.55	2.98
miyu	0.13	121	0	1	0	444	20	0.27	7.82
lbyu	0.5	11	0	0	0	16	20	0.82	1.18
lbyu	-0.07	93	0	0	0	16	20	0.82	1.18
miyu	0	34	0	1	0	444	20	0.27	7.82
loyu	0.6	28	0	0	0	50	20	0.73	3.01
tulb	0.4	17	0	0	0	81	16	1.03	12.11
lolb	0	11	1	0	0	50	16	1.55	2.98
tulb	-1	11	1	0	0	81	16	1.03	12.11
tulo	0.2	11	1	0	0	81	50	0.52	0
lolb	0.57	11	0	0	0	50	16	1.55	2.98
tulo	0	40	0	0	0	81	50	0.52	0
lolb	0.67	40	0	0	0	50	16	1.55	2.98
lotu	-1	28	1	0	0	50	81	0.52	0
tulb	-0.5	28	1	0	0	81	16	1.03	12.11
yulb	0	28	1	0	0	20	16	0.82	1.18
yulo	-0.6	28	1	0	0	20	50	0.73	3.01
tulb	0.17	39	0	0	0	81	16	1.03	12.11
loyu	0.38	30	0	0	0	50	20	0.73	3.01
loyu	1	26	0	0	0	50	20	0.73	3.01
tulb	0.2	16	0	0	0	81	16	1.03	12.11
lolb	0.67	10	0	0	0	50	16	1.55	2.98
yulo	-0.5	67	0	0	0	20	50	0.73	3.01
yulo	0.71	44	0	0	0	20	50	0.73	3.01
lbmi	0.33	11	0	0	1	16	444	0.55	1.67
tulb	0.5	12	0	0	0	81	16	1.03	12.11
milb	0.5	13	0	1	0	444	16	0.55	1.67
milb	0.63	28	0	1	0	444	16	0.55	1.67
lbbo	0.33	12	0	0	1	16	396	0	1.15
lbbo	-0.33	35	0	0	1	16	396	0	1.15
loyu	0.3	30	0	0	0	50	20	0.73	3.01
bolo	0.09	20	0	1	0	396	50	1.55	23.52
tuga	-1	13	1	0	0	81	312	0.15	0
tulo	0.88	46	0	0	0	81	50	0.52	0
tulb	0.29	16	0	0	0	81	16	1.03	12.11
tulb	0.2	17	0	0	0	81	16	1.03	12.11
tulo	0.8	12	0	0	0	81	50	0.52	0
galb	0.5	15	0	0	0	312	16	0.88	1.97
bolb	0	16	0	1	0	396	16	0	1.15
lolb	0.31	23	0	0	0	50	16	1.55	2.98
balb	0.25	21	0	1	0	441	16	0.98	8.21
balb	0	27	0	1	0	441	16	0.98	8.21
balb	1	13	1	1	0	441	16	0.98	8.21
batu	1	13	1	1	0	441	81	2.02	0
tulb	1	13	1	0	0	81	16	1.03	12.11
tuch	0.36	55	0	0	1	81	469	1.78	12.66
walo	0.75	10	0	1	0	83	50	1	0.52
wagy	0.33	17	0	1	1	83	344	0.45	3.05
wagy	-0.5	14	1	1	1	83	344	0.45	3.05
wasa	0.5	14	1	1	1	83	111	1.78	54.37
lowa	0.17	18	1	0	1	50	83	1	0.52
wagy	-0.5	18	1	1	1	83	344	0.45	3.05
lbyu	-0.14	113	0	0	0	16	20	0.82	1.18
lolb	0.7	43	0	0	0	50	16	1.55	2.98
sawa	1	20	0	1	1	111	83	1.78	54.37
tuju	0.33	29	0	0	1	81	396	1.57	7
julb	-1	26	0	1	0	396	16	0.53	1.47
tulb	-0.21	21	0	0	0	81	16	1.03	12.11
lbdo	-1	104	1	0	1	16	310	0.18	48.1
tulb	0.43	104	1	0	0	81	16	1.03	12.11
lbtu	-0.38	92	0	0	0	16	81	1.03	12.11
tulb	0.33	13	0	0	0	81	16	1.03	12.11
tuyu	0	13	1	0	0	81	20	0.22	4.02
tuyu	0.43	25	0	0	0	81	20	0.82	1.18
yulb	-0.8	13	1	0	0	20	16	0.22	4.02
tuyu	0.2	19	0	0	0	81	20	0.22	4.02
lbtu	0.67	45	0	0	0	16	81	1.03	12.11
lbdo	0	11	0	0	1	16	310	0.18	48.1
lbtu	0.75	11	0	0	0	16	81	1.03	12.11
lbtu	0.33	16	0	0	0	16	81	1.03	12.11
lbtu	0.37	94	1	0	0	16	81	1.03	12.11
tudo	-0.14	94	1	0	1	81	310	0.85	33.58
tulb	-0.55	93	0	0	0	81	16	1.03	12.11
lbdo	0	79	1	0	1	16	310	0.18	48.1
lbtu	-0.4	79	1	0	0	16	81	1.03	12.11
tudo	-1	79	1	0	1	81	310	0.85	33.58
tulb	0	10	0	0	0	81	16	1.03	12.11
lbtu	-0.3	32	1	0	0	16	81	1.03	12.11
tudo	-0.33	32	1	0	1	81	310	0.85	33.58
tujo	0.17	175	0	0	0	81	480	3.2	4.51
lbch	0	188	0	0	1	16	469	0.75	4.73
loyu	0.67	15	1	0	0	50	20	0.73	3.01
yusa	-0.67	15	1	0	1	20	111	2.05	5.32
loyu	0.78	29	0	0	0	50	20	0.73	3.01
lolb	0	10	0	0	0	50	16	1.55	2.98
loyu	0	15	0	0	0	50	20	0.73	3.01
lbtu	0	24	0	0	0	16	81	1.03	12.11
lbtu	0	10	0	0	0	16	81	1.03	12.11
lbtu	0	11	0	0	0	16	81	1.03	12.11
lbtu	-0.4	21	0	0	0	16	81	1.03	12.11
lbjo	-0.33	24	0	0	0	16	480	2.17	7.4
lolb	0.17	16	0	0	0	50	16	1.55	2.98
lbyu	0.89	35	0	0	0	16	20	0.82	1.18
jolb	0.89	12	0	0	0	480	16	2.17	7.4
loyu	1	10	0	0	0	50	20	0.73	3.01
loyu	0.31	46	0	0	0	50	20	0.73	3.01
lbtu	-0.33	19	0	0	0	16	81	1.03	12.11
loyu	1	24	0	0	0	50	20	0.73	3.01
chlb	0.6	79	0	1	0	469	16	0.75	4.73
salb	0.86	46	0	1	0	111	16	1.23	2.92
salb	0.56	80	0	1	0	111	16	1.23	2.92
tulb	-0.5	25	0	0	0	81	16	1.03	12.11
tulb	0.29	16	0	0	0	81	16	1.03	12.11
tulb	0.67	55	0	0	0	81	16	1.03	12.11
tulb	0.2	36	0	0	0	81	16	1.03	12.11
tulb	-0.25	26	0	0	0	81	16	1.03	12.11
loyu	0.6	18	0	0	0	50	20	0.73	3.01
tulb	0	76	0	0	0	81	16	1.03	12.11
tulb	0.41	79	0	0	0	81	16	1.03	12.11
loyu	0.64	26	0	0	0	50	20	0.73	3.01
lbyu	0.17	37	0	0	0	16	20	0.82	1.18
tulb	-1	12	0	0	0	81	16	1.03	12.11
satu	-0.5	10	0	1	0	111	81	2.27	1.14
lbtu	0.67	19	0	0	0	16	81	1.03	12.11
gylo	-0.25	20	0	1	0	344	50	1.45	28.66
gylo	0.27	22	0	1	0	344	50	1.45	28.66
salb	-1	52	0	1	0	111	16	1.23	2.92
tulb	-1	66	0	0	0	81	16	1.03	12.11
lbtu	1	10	1	0	0	16	81	1.03	12.11
lolb	1	10	1	0	0	50	16	1.55	2.98
lotu	1	10	1	0	0	50	81	0.52	0
salb	1	18	1	1	0	111	16	1.23	2.92
salo	1	18	1	1	0	111	50	2.78	3.12
satu	1	18	1	1	0	111	81	2.27	1.14
tulb	-0.5	15	0	0	0	81	16	1.03	12.11
lolb	0	19	0	0	0	50	16	1.55	2.98
lolb	0.33	30	0	0	0	50	16	1.55	2.98
tulb	-0.67	21	0	0	0	81	16	1.03	12.11
tulo	-0.33	12	0	0	0	81	50	0.52	0
jolb	0.83	159	0	0	0	480	16	2.17	7.4
gajo	0	15	0	0	0	312	480	3.05	13.26
lojo	1	10	0	0	0	50	480	3.72	3.18
jolb	1	89	0	0	0	480	16	2.17	7.4
jolb	0.64	67	0	0	0	480	16	2.17	7.4
tulb	1	23	1	0	0	81	16	1.03	12.11
lotu	0.25	34	0	0	0	50	81	0.52	0
lojo	-0.33	41	0	0	0	50	480	3.72	3.18
lojo	-0.67	31	0	0	0	50	480	3.72	3.18
jolb	0.67	135	0	0	0	480	16	2.17	7.4
lolb	1	14	0	0	0	50	16	1.55	2.98
lolb	-0.13	94	0	0	0	50	16	1.55	2.98
lolb	0	14	0	0	0	50	16	1.55	2.98
yujo	-0.5	24	0	0	0	20	480	2.98	8.6
lolb	0.4	21	0	0	0	50	16	1.55	2.98
tuga	0	34	0	0	0	81	312	0.15	0
galo	-1	10	1	0	0	312	50	0.67	1.82
tuga	0	10	1	0	0	81	312	0.15	0
lbtu	-0.75	10	0	0	0	16	81	1.03	12.11
lblo	-0.2	20	0	0	0	16	50	1.55	2.98
jotu	-1	15	0	0	0	480	81	3.2	4.51
jotu	0.25	110	0	0	0	480	81	3.2	4.51
walb	-1	28	0	1	0	83	16	0.55	6.52
lowa	0	36	0	0	1	50	83	1	0.52
lolb	-0.5	11	0	0	0	50	16	1.55	2.98
yulb	0.43	42	0	0	0	20	16	0.82	1.18
yulb	0	45	0	0	0	20	16	0.82	1.18
lbwa	1	13	0	0	1	16	83	0.55	6.52
waju	1	47	0	1	1	83	396	1.08	2.95
waju	0.77	65	0	1	1	83	396	1.08	2.95
waju	1	10	0	1	1	83	396	1.08	2.95
waju	0	26	1	1	1	83	396	1.08	2.95
yulb	0	134	0	0	0	20	16	0.82	1.18
tulo	-0.14	45	0	0	0	81	50	0.52	0
tulo	0.11	44	0	0	0	81	50	0.52	0
tulo	0	18	0	0	0	81	50	0.52	0
tulo	-0.11	25	0	0	0	81	50	0.52	0
tulo	-0.5	11	0	0	0	81	50	0.52	0
yulo	0	33	0	0	0	20	50	0.73	3.01
yulb	-0.13	37	0	0	0	20	16	0.82	1.18
yulb	0.35	85	0	0	0	20	16	0.82	1.18
lbwa	-0.57	37	0	0	1	16	83	0.55	6.52
lolb	-0.07	69	0	0	0	50	16	1.55	2.98
lbjo	-0.5	15	0	0	0	16	480	2.17	7.4
walb	0	10	0	1	0	83	16	0.55	6.52
walo	0.33	21	0	1	0	83	50	1	0.52
tuga	0	32	0	0	0	81	312	0.15	0
tulb	-0.25	43	0	0	0	81	16	1.03	12.11
tuga	-0.17	31	0	0	0	81	312	0.15	0
tuga	0.25	64	0	0	0	81	312	0.15	0
tuga	0	17	0	0	0	81	312	0.15	0
tuga	-0.25	26	0	0	0	81	312	0.15	0
walo	-0.4	13	0	1	0	83	50	1	0.52
tuyu	1	17	1	0	0	81	20	0.52	0
loyu	1	17	1	0	0	50	20	0.22	4.02
tuyu	0.36	23	0	0	0	81	20	0.22	4.02
lotu	-0.45	68	0	0	0	50	81	0.52	0
loyu	0.22	17	0	0	0	50	20	0.73	3.01
lolb	0.2	27	0	0	0	50	16	1.55	2.98
lolb	0.43	21	0	0	0	50	16	1.55	2.98
walo	0.33	11	0	1	0	83	50	1	0.52
watu	0	20	0	1	0	83	81	0.48	0
yumi	-0.75	20	0	0	1	20	444	0.27	7.82
sayu	-0.69	72	0	1	0	111	20	2.05	5.32
yulo	-0.63	28	0	0	0	20	50	0.73	3.01
yulo	0.33	19	0	0	0	20	50	0.73	3.01
yumi	-0.67	10	0	0	1	20	444	0.27	7.82
sayu	0	10	0	1	0	111	20	2.05	5.32
sayu	-0.17	52	0	1	0	111	20	2.05	5.32
sayu	-0.13	37	0	1	0	111	20	2.05	5.32
miyu	1	27	0	1	0	444	20	0.27	7.82
miyu	0.83	31	0	1	0	444	20	0.27	7.82
milo	1	18	1	1	0	444	50	0.73	3.01
miyu	-1	18	1	1	0	444	20	1	4.9
loyu	0.38	18	1	0	0	50	20	0.27	7.82
lolb	-0.33	16	0	0	0	50	16	1.55	2.98
julb	0	12	0	1	0	396	16	0.53	1.47
logy	0	25	0	0	1	50	344	1.45	28.66
losa	0	10	0	0	1	50	111	2.78	3.12
losa	0.25	32	1	0	1	50	111	2.78	3.12
yusa	0	32	1	0	1	20	111	0.73	3.01
yulo	0	32	1	0	0	20	50	2.05	5.32
salo	-0.25	42	1	1	0	111	50	2.78	3.12
milb	0.38	45	0	1	0	444	16	0.55	1.67
milb	0	13	1	1	0	444	16	0.55	1.67
salb	0.5	13	1	1	0	111	16	1.23	2.92
salb	0.43	17	0	1	0	111	16	1.23	2.92
boyu	0.75	18	0	1	0	396	20	0.82	47.62
walo	-0.13	58	0	1	0	83	50	1	0.52
gylo	0.3	100	0	1	0	344	50	1.45	28.66
yulo	0.25	23	0	0	0	20	50	0.73	3.01
lolb	0.08	47	0	0	0	50	16	1.55	2.98
lbwa	-0.78	32	0	0	1	16	83	0.55	6.52
lbwa	-0.55	45	0	0	1	16	83	0.55	6.52
lbwa	-0.5	13	0	0	1	16	83	0.55	6.52
lbwa	-0.57	86	0	0	1	16	83	0.55	6.52
lbwa	0	16	0	0	1	16	83	0.55	6.52
walb	0.25	65	0	1	0	83	16	0.55	6.52
lbyu	1	11	0	0	0	16	20	0.82	1.18
yusa	0.11	60	0	0	1	20	111	2.05	5.32
yusa	0.25	17	0	0	1	20	111	2.05	5.32
yujo	-0.92	74	0	0	0	20	480	2.98	8.6
sayu	0.2	48	0	1	0	111	20	2.05	5.32
julb	-1	10	1	1	0	396	16	0.53	1.47
lbtu	0	10	1	0	0	16	81	1.03	12.11
tuyu	1	10	1	0	0	81	20	0.22	4.02
yulb	-1	10	1	0	0	20	16	0.82	1.18
lbju	0	13	1	0	1	16	396	0.53	1.47
yulb	0.67	13	1	0	0	20	16	0.82	1.18
julb	-1	11	1	1	0	396	16	0.53	1.47
lbtu	-0.67	11	1	0	0	16	81	1.03	12.11
tuyu	0	11	1	0	0	81	20	0.22	4.02
juyu	1	15	1	1	0	396	20	1.35	1.49
yulb	-1	15	1	0	0	20	16	0.82	1.18
gylo	-0.07	178	0	1	0	344	50	1.45	28.66
walo	-0.9	40	0	1	0	83	50	1	0.52
walo	-0.04	171	0	1	0	83	50	1	0.52
loyu	0.8	32	0	0	0	50	20	0.73	3.01
tuyu	0.64	13	0	0	0	81	20	0.22	4.02
boyu	0.38	99	0	1	0	396	20	0.82	47.62
tulo	0.36	73	0	0	0	81	50	0.52	0
tulo	-0.2	11	0	0	0	81	50	0.52	0
lodo	-0.4	30	0	0	1	50	310	1.37	1.28
wayu	0.23	43	0	1	0	83	20	0.27	5.99
yumi	0.09	43	0	0	1	20	444	0.27	7.82
yumi	-0.67	39	0	0	1	20	444	0.27	7.82
boyu	0.2	17	0	1	0	396	20	0.82	47.62
yumi	-0.33	19	0	0	1	20	444	0.27	7.82
lbba	0	22	0	0	1	16	441	0.98	8.21
